# Supplementary material for: Facile synthesis of cross-linked Ag–CdS nanoshell morphology for highly efficient photocatalytic activity
Source: Royal Society of Chemistry journal article supplement (doi:10.1039/d3nj02677a), 2023-01-01

## Supporting Information

### Facile Synthesis of Cross-linked Ag-CdS Nanoshell Morphology for Highly Efficient Photocatalytic Activity

Shubhranshu Bhandari<sup>1,\*,#</sup>, Mir Sahidul Ali<sup>2,\*,#</sup>, Debayan Roy<sup>3,\*</sup>, Suresh Saini<sup>4,\*</sup>, Mir Intaj Ali<sup>5</sup>,  
Mir Sahanur Ali<sup>2,6</sup>

<sup>1</sup> College of Engineering, Mathematics and Physical Sciences, Environment and Sustainability Institute, University of Exeter, Penryn Campus, United Kingdom, TR10 9FE

<sup>2</sup> Department of Polymer Science and Technology, University of Calcutta, 92 A.P.C. Road, Kolkata - 700 009, West Bengal, India

<sup>3</sup> Independent Researcher, 265, Nripen Sarkar Road, Sahid Nagar, Kanchrapara, North-24 Parganas - 743145, India

<sup>4</sup> Centre for Nano and Material Sciences (CNMS), Jain Global Campus, JAIN (Deemed-to-be University), Bangalore - 562112 India

<sup>5</sup> Central Institute of Petrochemicals Engineering and Technology (CIPET): Institute of Petrochemicals Technology (IPT) –Bhubaneswar, B-25, CNI complex, Patia, Odisha - 751024, India.

<sup>6</sup> Centre for Research in Nanoscience and nanotechnology, University of Calcutta, Kolkata - 700106, West Bengal, India

\* These authors have equal contributions.

#Corresponding authors: [s.bhandari@exeter.ac.uk](mailto:s.bhandari@exeter.ac.uk), [shubhranshu0094@gmail.com](mailto:shubhranshu0094@gmail.com),  
[mir.sahidul@gmail.com](mailto:mir.sahidul@gmail.com)

| Elements | Weight% |
|----------|---------|
| S        | 48.44   |
| Ag       | 11.86   |
| Cd       | 39.70   |
| Totals   | 100.00  |

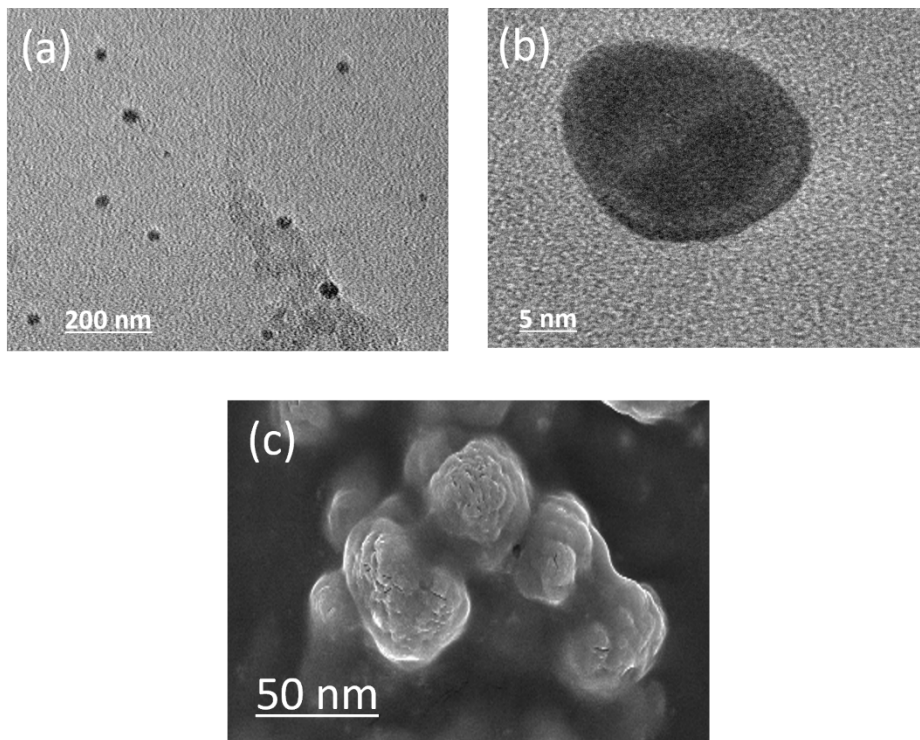

**Figure S1.** (a-b) TEM images of Ag nanoparticles, (c) SEM image of the Ag nanoparticles, respectively

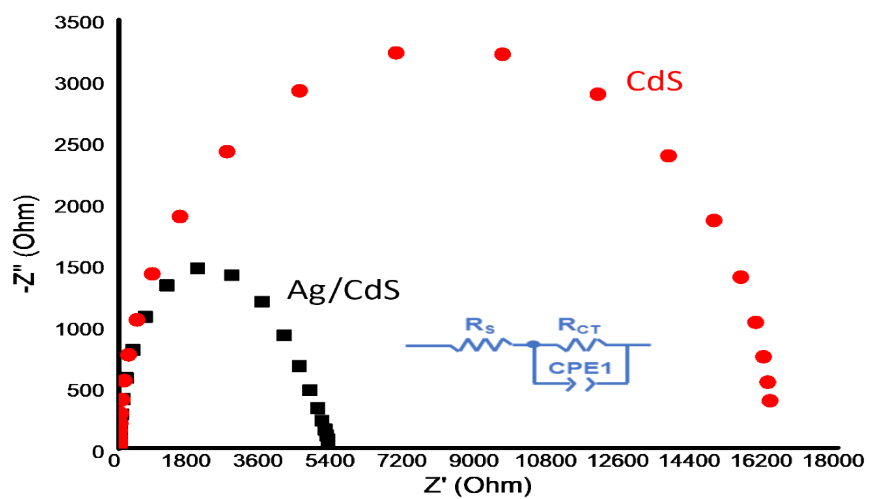

**Figure S2.** EIS Nyquist plots of CdS and Ag-CdS nanostructures with circuit diagram at the inset

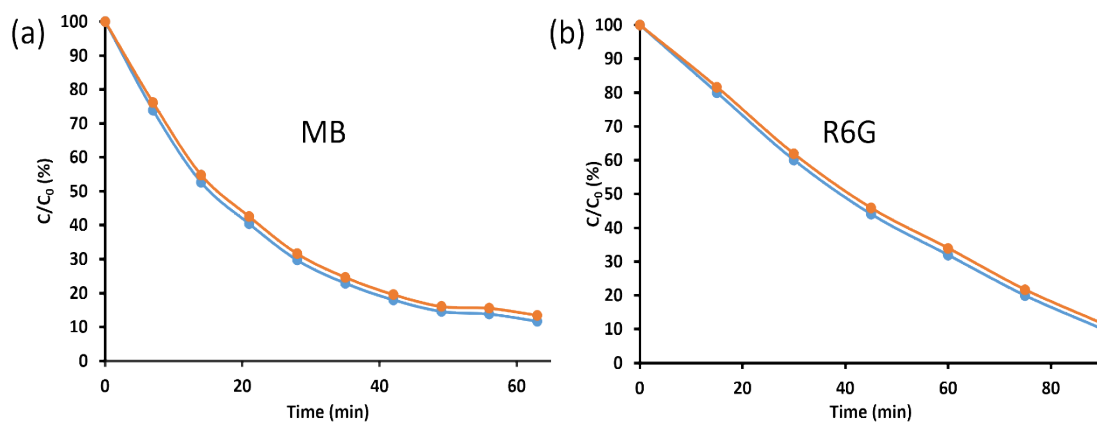

**Figure S3.** Repeated experiments of photocatalytic degradation of MB and R6G in the presence of Ag/CdS composite after the first (Blue) and fourth (Orange) round, respectively

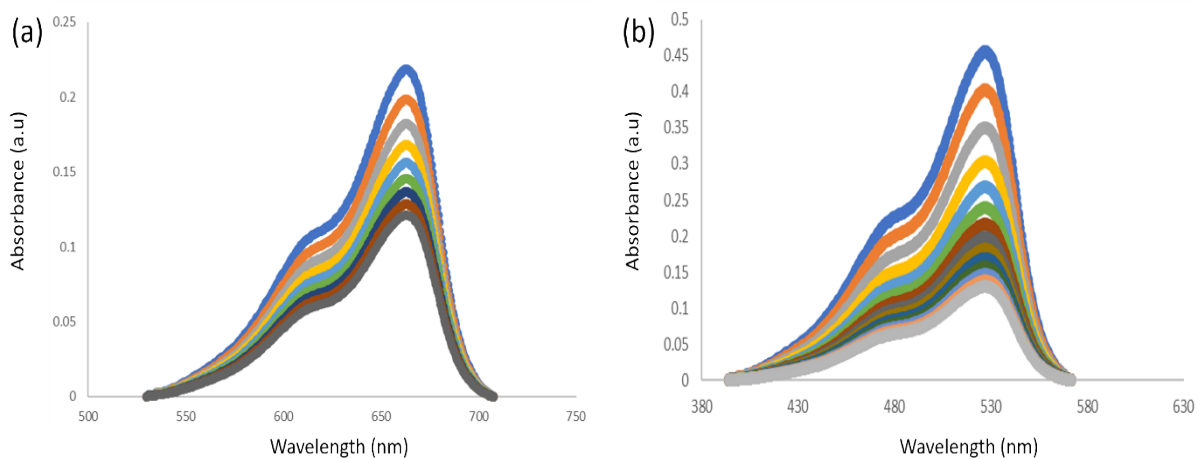

**Figure S4.** (a-b) Visible light photodegradation of MB and R6G dyes in the presence of CdS nanostructures, respectively

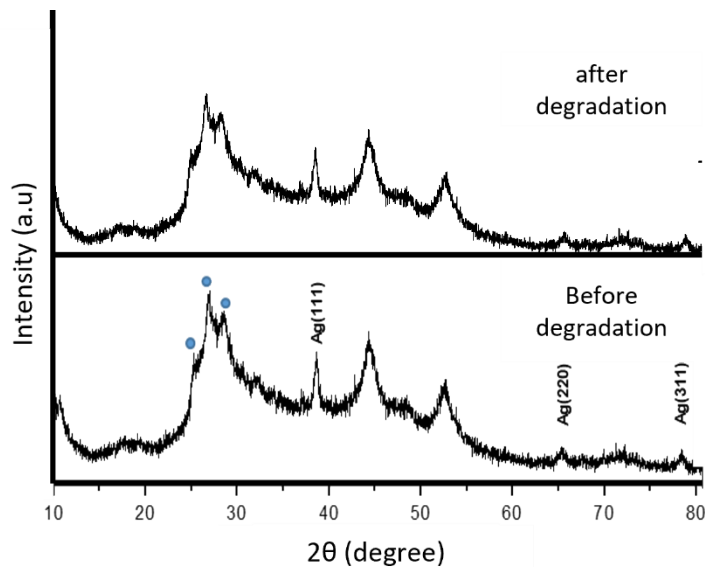

**Figure S5.** XRD pattern comparison for Ag/CdS heterostructure before dye degradation and after dye degradation for the fourth cycle

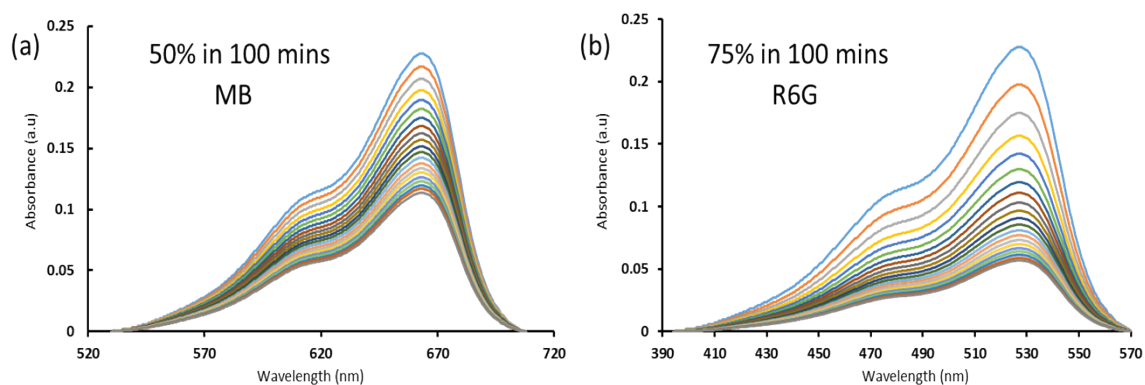

**Figure S6.** TOC test for mineralization rate of MB and R6G by ultra-violet photooxidation method with the Ag-CdS catalyst

### Schematic representation of dye degradation mechanism

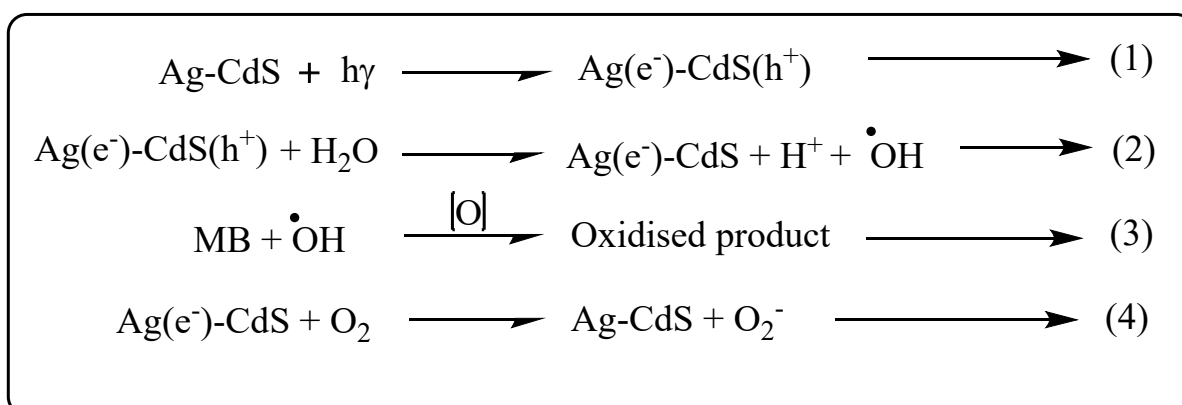

Supplement: d3nj02677a1.pdf [file d3nj02677a1.pdf]
